# Supplementary material for: p66Shc activation promotes increased oxidative phosphorylation and renders CNS cells more vulnerable to amyloid beta toxicity
Source: PubMed Central journal article supplement (PMC6244282; doi:10.1038/s41598-018-35114-y), 2018-11-20

## Supplementary Information

### **p66Shc activation promotes increased oxidative phosphorylation and renders CNS cells more vulnerable to amyloid beta toxicity**

**Authors:** Asad Lone, Richard A. Harris, Olivia Singh, Dean H. Betts and Robert C. Cumming

#### **Supplementary Figure Legends**

#### **Figure S1. A $\beta$ exposure promotes p66Shc phosphorylation independent of JNK activation**

**in B12 cells.** (A) Immunoblot analysis of extracts from B12 cells treated with A $\beta_{1-42}$  (20 $\mu$ M) for 24 hours. p66Shc phosphorylation was significantly increased following A $\beta$  treatment, whereas JNK phosphorylation was not affected. (B) Densitometric analysis of immunoblots. Data presented are the mean  $\pm$  SEM of 3 independent experiments (\*P<0.05, \*\*P<0.01; \*\*\*P<0.001).

#### **Figure S2. A $\beta$ exposure promotes p66Shc phosphorylation independent of JNK activation**

**in HT22 cells.** (A) Immunoblot analysis of extracts from HT22 cells transfected with the p66Shc and pcDNA plasmids and treated with A $\beta_{1-42}$  (20  $\mu$ M) for 24 hours. (B) Densitometric analysis of immunoblots revealed significantly higher p66Shc phosphorylation levels as a result of A $\beta$  exposure. No change was observed in JNK phosphorylation levels following A $\beta$  exposure. Data presented are the mean  $\pm$  SEM of 3 independent experiments (\*P<0.05, \*\*P<0.01; \*\*\*P<0.001).

**A**

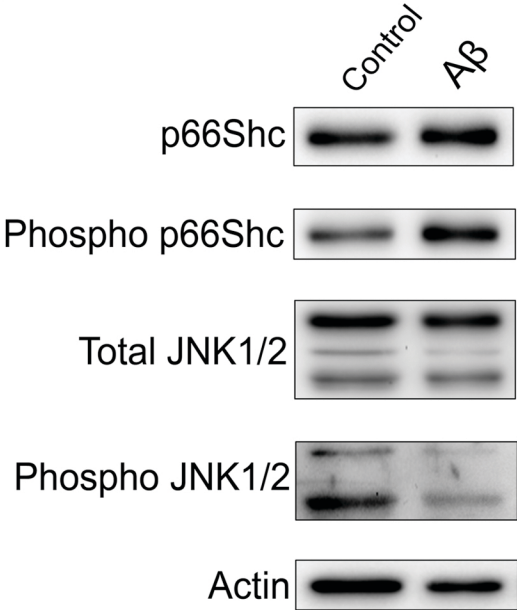

**B**

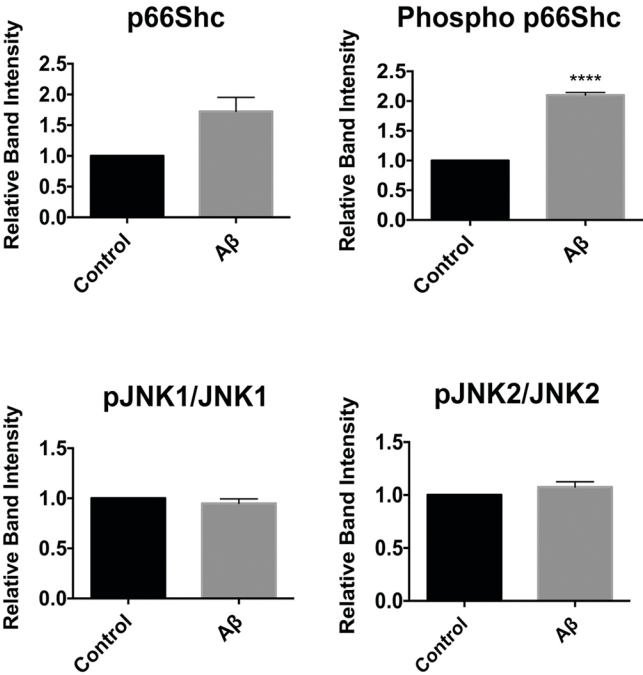

**A**

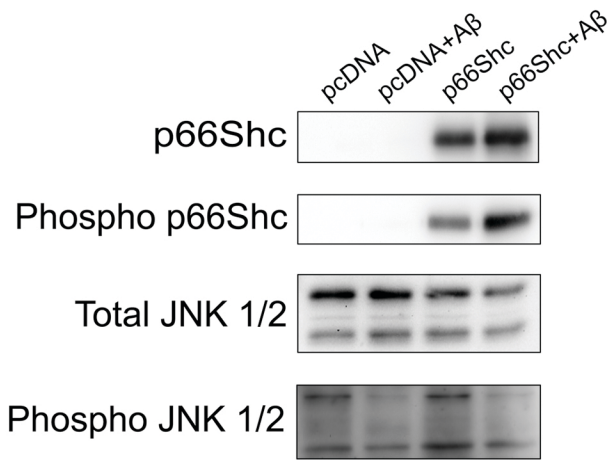

**B**

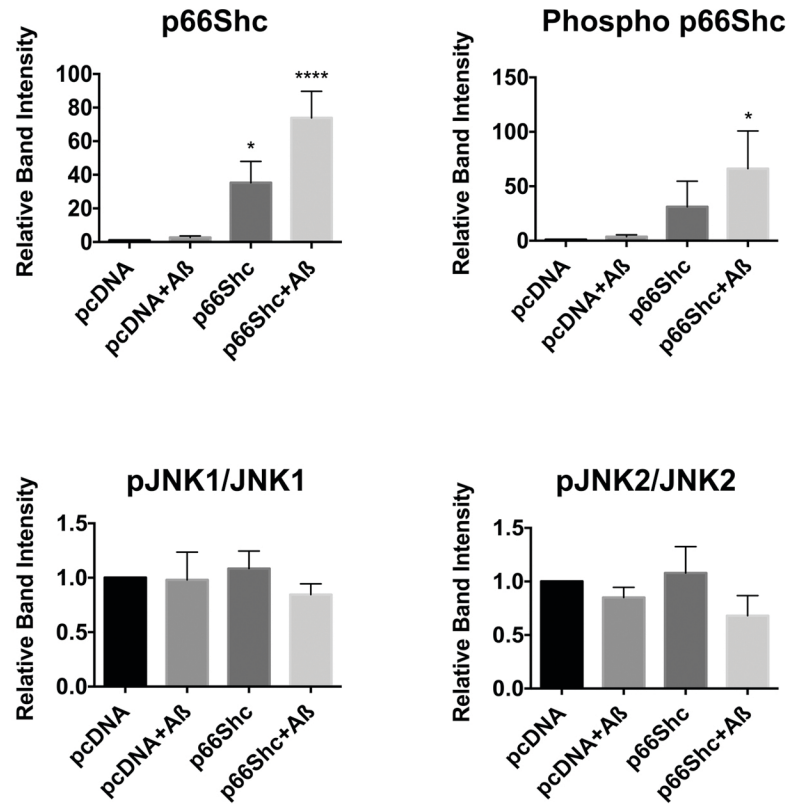

Supplement: 41598_2018_35114_MOESM1_ESM.pdf [file 41598_2018_35114_MOESM1_ESM.pdf]
